# Supplementary material for: A high performance flexible all solid state supercapacitor based on the MnO2sphere coated macro/mesoporous Ni/C electrode and ionic conducting electrolyte
Source: Royal Society of Chemistry journal article supplement (doi:10.1039/c6nr02215d), 2016-01-01
Supplement: c6nr02215d1.pdf [file c6nr02215d1.pdf]

## Supporting information

High performance flexible all solid state supercapacitor based on MnO<sub>2</sub> spheres coated macro/mesoporous Ni/C electrode and ionic conducting electrolyte

Jian Zhi<sup>a,b\*</sup>, Oliver Reiser<sup>a</sup>, Youfu Wang<sup>b</sup>, Aiguo Hu<sup>b</sup>.

<sup>a</sup>Institute of Organic Chemistry, University of Regensburg, Universitätsstr.31,93053 Regensburg, Germany

<sup>b</sup>Shanghai Key Laboratory of Advanced Polymeric Materials, School of Materials Science and Engineering, East China University of Science and Technology, Shanghai 200237, China

Email: jian.zhi@outlook.com

### Calculation

If the capacitances of the two electrodes, i.e. positive and negative, can be expressed as  $C_p$  and  $C_n$ , respectively, the overall capacitance ( $C_T$ ) of the entire cell can be expressed as eqn (1):<sup>1</sup>

$$\frac{1}{C_T} = \frac{1}{C_p} + \frac{1}{C_n} \quad (1)$$

In a symmetrical supercapacitor,  $C_p = C_n = C_0$ , where  $C_0$  represents the per-electrode capacitance and in this study represents the capacitance of one electrode. So the relationship between  $C_T$  and  $C_0$  should be as eqn (2):

$$C_0 = 2C_T = \frac{2I(t-t_{OMC})}{V} \quad (2)$$

where  $I$ ,  $t$  and  $V$  are charged current,  $t$  is the discharge time,  $t_{OMC}$  is the discharge time of blank OMC membrane on Nickel foam.  $V$  is the voltage drop upon discharging (excluding IR drop).

As a result, the per-electrode specific capacitance ( $C_{s0}$ ) and volumetric capacitance ( $C_{v0}$ ) of MnO<sub>2</sub>-MNC electrode is shown in eqn (3) and eqn (4):

$$C_{s0} = \frac{C_0}{m_0} = \frac{2I(t-t_{OMC})}{m_0V} = \frac{4I(t-t_{OMC})}{m_TV} = 4C_{s-cell} \quad (3)$$

$$C_{v0} = \frac{C_0}{v_0} = \frac{2I(t-t_{OMC})}{v_0V} = \frac{4I(t-t_{OMC})}{v_TV} = 4C_{v-cell} \quad (4)$$

Where  $m_0$  is the mass of active materials in one electrode,  $m_T$  represents the total mass of active materials in the whole cell, in which  $m_T = 2m_0$ .  $C_{s-cell}$  is the specific capacity of the whole cell.

$V_0$  is the volume of one electrode (about 0.08 cm<sup>3</sup>). Considering the very low thickness of separator (Celgard 3501, about 50 μm), the total volume of the device  $v_t \approx 2v_0$ .  $C_{v-cell}$  is the volumetric capacitance of the whole device.

The specific energy ( $E_s$ ) and power densities ( $P_s$ ) of this supercapacitor can be expressed as eqn (5) and (6):<sup>2</sup>

$$E_s = \frac{1}{2} C_{s-cell} V^2 = \frac{1}{8} C_{s0} V^2 \quad (5)$$

$$P_s = \frac{E_s}{t} \quad (6)$$

The corresponding volumetric energy and power density are calculated through eqn (7) and (8):

$$E_v = \frac{1}{2} C_{v-cell} V^2 = \frac{1}{8} C_{v0} V^2 \quad (7)$$

$$P_v = \frac{E_v}{t} \quad (8)$$

### Measurement of ionic conductivity

Ionic conductivity of PVA-BMIMCl-Li<sub>2</sub>SO<sub>4</sub> gel in the supercapacitor is determined from impedance spectrum. The sample is sandwiched between two nickel foam sheets in this measurement. The ionic conductivity  $\sigma$  (mS cm<sup>-1</sup>) of gel is calculated by the following equation

$$\sigma = L/(R \times S) \times 1000 \quad (9)$$

where  $L$  (cm) is the distance between the two nickel foam sheets,  $R(\Omega)$  is the bulk resistance, and  $S$  (cm<sup>2</sup>) is the contact area of the gel and nickel foam sheets during the experiment.

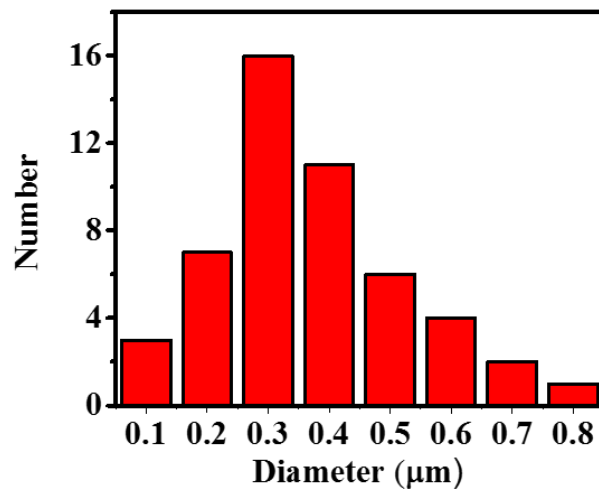

**Figure S1.** Histograms of diameters for 50 MnO<sub>2</sub> spherical particles.

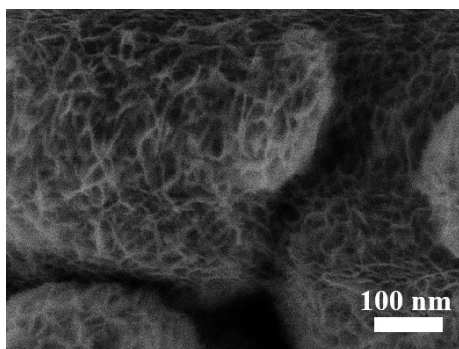

**Figure S2.** High-magnification SEM image of  $\text{MnO}_2$  spheres.

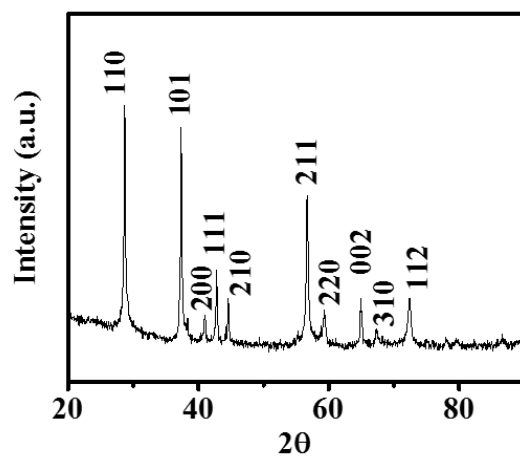

**Figure S3.** XRD patterns of  $\text{MnO}_2$  spherical particles.

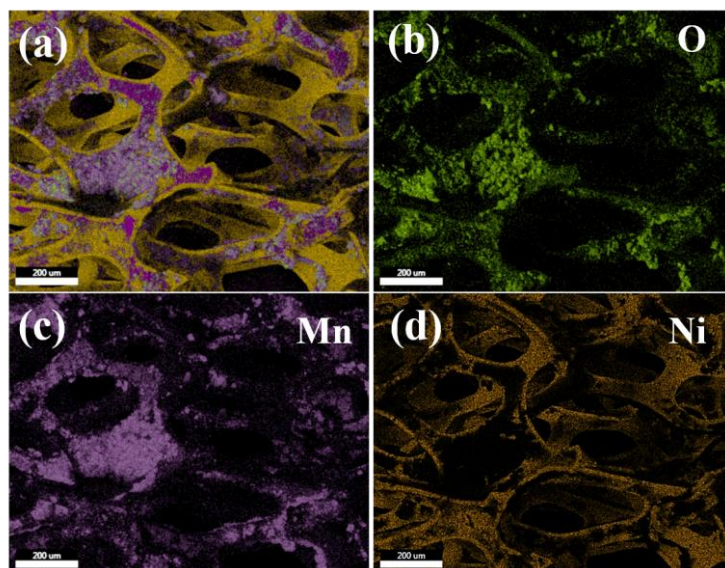

**Figure S4.** EDX maps of  $\text{MnO}_2$ -MNC composites: (a) overlapping figures; (b-d) O, Mn and Ni EDX maps.

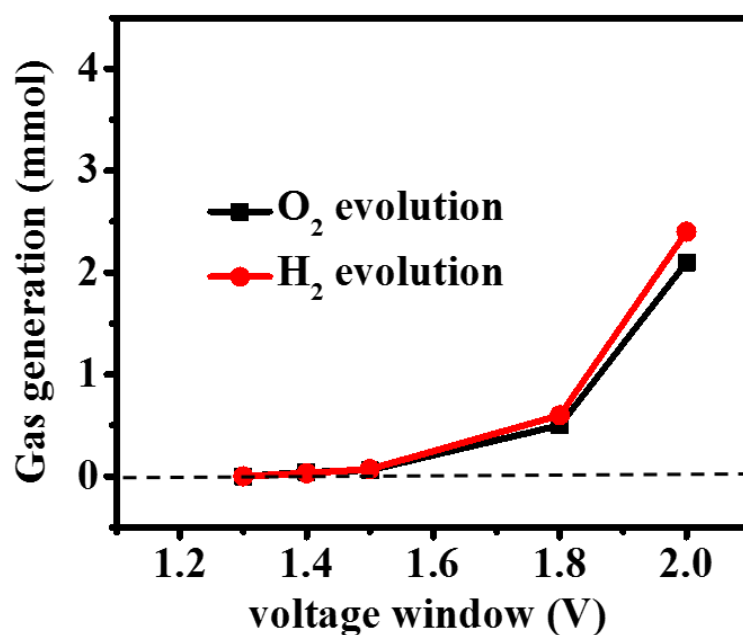

**Figure S5.** Threshold voltage of water splitting. Determined by H<sub>2</sub> and O<sub>2</sub> accumulation (measured by gas chromatography) in sealed MnO<sub>2</sub>-MNC symmetric cell in PVA-BMIMCl-Li<sub>2</sub>SO<sub>4</sub> over 24 h under charge-discharge at 1 Ag<sup>-1</sup>.

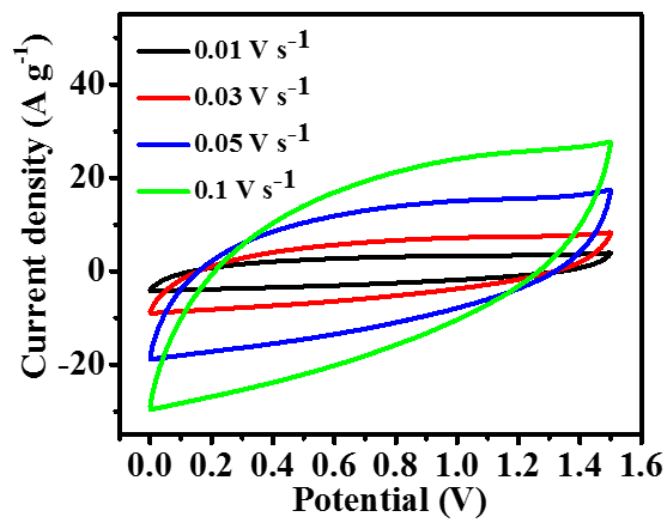

**Figure S6.** CV curves of MnO<sub>2</sub>-MNC symmetrical supercapacitor in different scan rates.

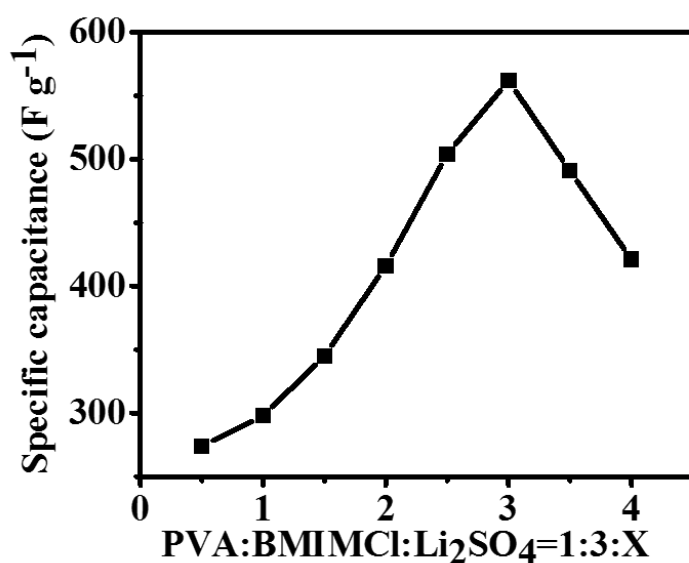

**Figure S7.** Per-electrode specific capacitance of MnO<sub>2</sub>-MNC symmetrical supercapacitor with different gel components.

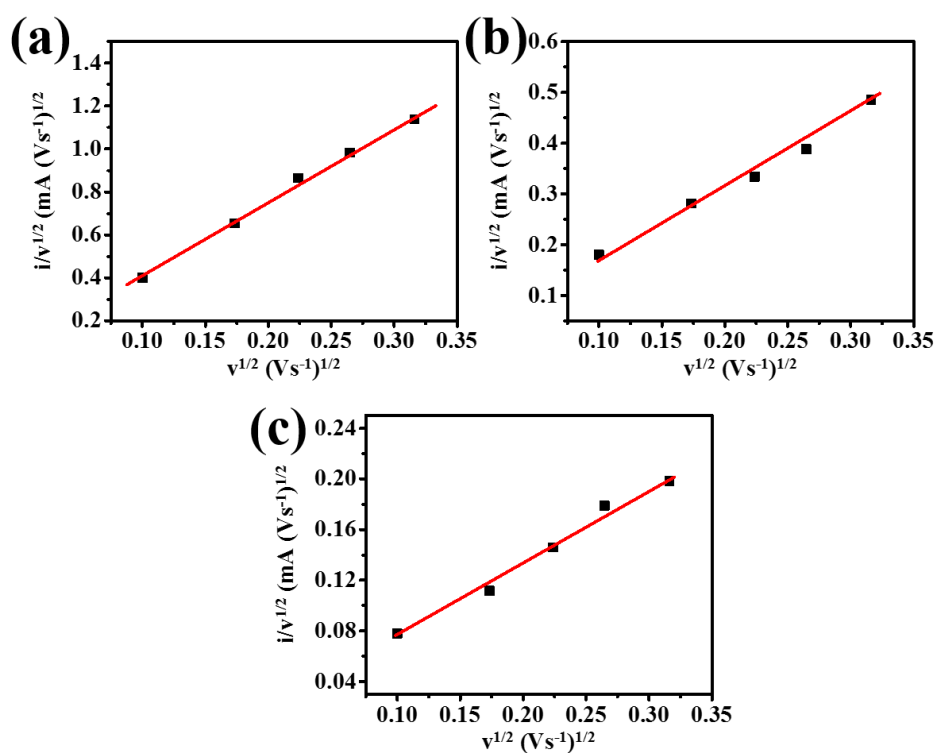

**Figure S8.** Use of equation (2) to analyze the voltammetric sweep data for MnO<sub>2</sub>-MNC (a), MnO<sub>2</sub>-MN (b) and MnO<sub>2</sub>-MC(c) at a specific potential of 0.5 V, sweep rates varied from 0.01 to 0.1Vs<sup>-1</sup>.

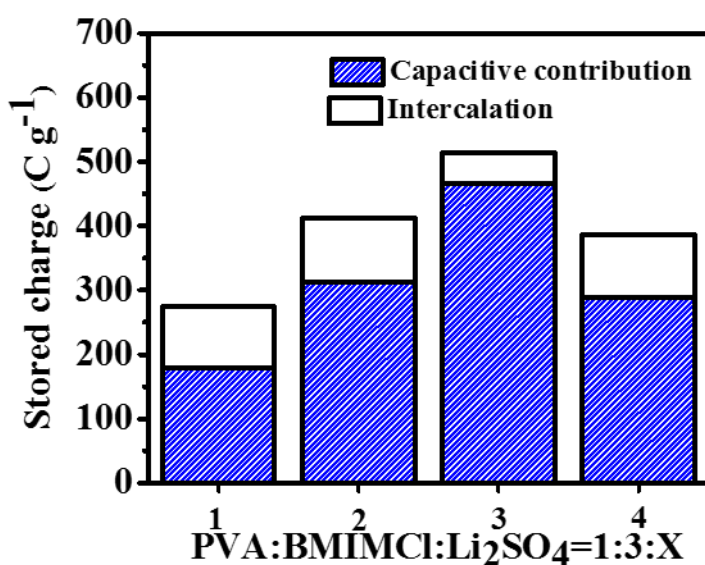

**Figure S9.** Comparison of charge storage with different concentrated gel electrolyte (at a scan rate of  $0.01 \text{ V s}^{-1}$ ).

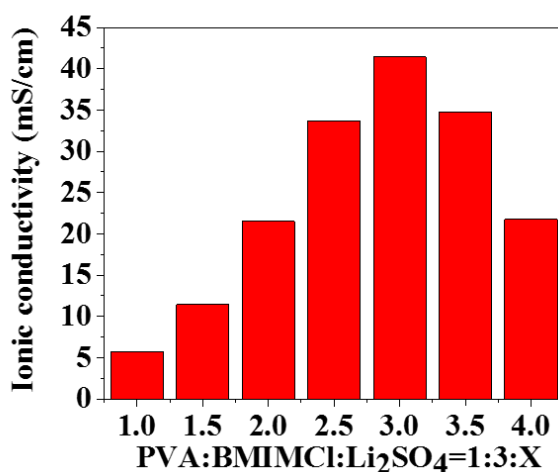

**Figure S10.** Ionic conductivity of PVA-BMIMCl-Li<sub>2</sub>SO<sub>4</sub> with different components.

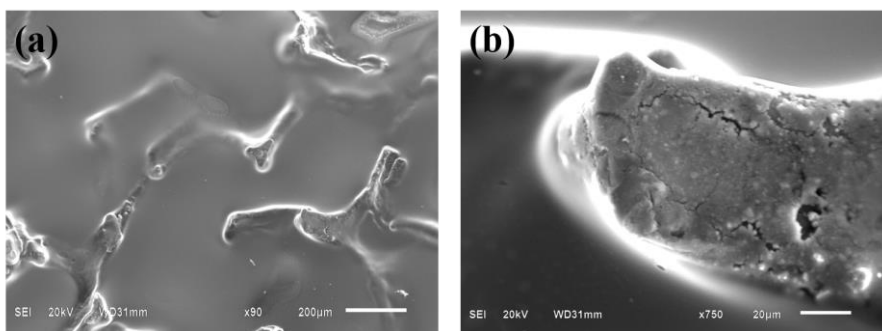

**Figure S11.** (a,b) SEM image of MnO<sub>2</sub>-MNC electrode (combined with gel electrolyte) after 6000 cycles.

## References

1. G. Wang, L. Zhang and J. Zhang, *Chem Soc Rev*, 2012, **41**, 797-828.

2. X. Lang, A. Hirata, T. Fujita and M. Chen, *Nature Nanotechnology*, 2011, **6**, 232-236.
3. Y. Xu, Z. Lin, X. Huang, Y. Liu, Y. Huang and X. Duan, *ACS nano*, 2013, **7**, 4042-4049.
